# Supplementary material
Source: MDPI journal article supplement (https://www.mdpi.com/2073-4344/8/7/258)
Supplement: s1 [file s1]

# Supplementary Materials: Assessing the Potential of Co-Pt Bronze for Electrocatalysis in Acidic Media

Yuji Kamitaka, Noboru Taguchi and Yu Morimoto

**Table S1.** Experimental set-ups for ORR test and accelerated durability test.

| Component           | Detail                                                                                                                                                                        |
|---------------------|-------------------------------------------------------------------------------------------------------------------------------------------------------------------------------|
| Cell                | Three electrode cell                                                                                                                                                          |
| Working electrode   | Catalyst deposited on Glassy carbon                                                                                                                                           |
| Counter electrode   | Au mesh connected with a salt bridge                                                                                                                                          |
| Reference electrode | RHE                                                                                                                                                                           |
| Electrolyte         | 0.1 M HClO <sub>4</sub> (Kanto Chemical, Ultrapure) 310 mL for OER and ORR measurements<br>With 48 ppm Cl <sup>-</sup> (by addition of 35 μL of 12M HCl) for potential cycles |
| Temperature         | 30 °C for OER and ORR measurement<br>60 °C for potential cycles                                                                                                               |

**Table S2.** Experimental procedures for OER test.

| Procedure                    | Details                                                                 |
|------------------------------|-------------------------------------------------------------------------|
| 1. Electrolyte deaeration    | Ar bubbling (30 min)                                                    |
| 2. Cyclic Voltammetry        | Potential cycling 0.05–1.7 V, 50 mV s <sup>-1</sup> , 400 rpm, 5 cycles |
| 3 Potential step and holding | 0.4 V for 10s to 1.7 V for 60 s, 400 rpm                                |

**Table S3.** Experimental procedures for ORR test.

| Procedure                    | Details                                                           |
|------------------------------|-------------------------------------------------------------------|
| 1. Electrolyte deaeration    | Ar bubbling (30 min)                                              |
| 2. Electrode cleaning        | Potential cycling 0.05–1.2 V, 500 mV s <sup>-1</sup> , 100 cycles |
| 3. ECSA determination        | Potential cycling 0.05–1.0 V, 50 mV s <sup>-1</sup> , 5 cycles    |
| 4. Background voltammetry    | 0.05–1.0 V, 10 mV s <sup>-1</sup> , 3 cycles                      |
| 5. O <sub>2</sub> saturation | O <sub>2</sub> bubbling (30 min)                                  |
| 6. ORR measurement           | 0.05–1.0 V, 10 mV s <sup>-1</sup> , 400 rpm, 1 cycle              |

**Table S4.** Experimental procedures for accelerated durability test.

| Procedure                 | Details                                                                                                                                                                               |
|---------------------------|---------------------------------------------------------------------------------------------------------------------------------------------------------------------------------------|
| 1. ORR test               | Same condition with Table S2                                                                                                                                                          |
| 2. Electrolyte change     | adding 12 M HCl, 35 μL                                                                                                                                                                |
| 3. ORR measurement        | in the electrolyte containing 48 ppm Cl <sup>-</sup>                                                                                                                                  |
| 4. Electrolyte deaeration | Ar bubbling (30 min)                                                                                                                                                                  |
| 5. ECSA measurement       | 0.05–1.0 V, 50 mV s <sup>-1</sup> , 5 cycles                                                                                                                                          |
| 6. Potential step cycle   | at 60 °C: 0.4–1.0 V each 3 s hold, 400 rpm                                                                                                                                            |
| 7. ECSA measurement       | 0.05–1.0 V, 50 mV s <sup>-1</sup> , 5 cycles after 100, 200, 300, 400, 500, 600, 700, 800, 900, 1000, 2000, 3000, 4000, 5000, 6000, 7000, 8000, 9000 and 10,000 potential step cycles |
| 8. Electrolyte sampling   | (3 mL) for Pt ion concentration analysis after 0, 100, 200, 1000, 2000 and 10,000 Potential step cycles                                                                               |
| 9. ORR measurement        | at 30 °C after O <sub>2</sub> bubbling (30 min)                                                                                                                                       |
| 10. ECSA measurement      | after Ar bubbling (30 min)                                                                                                                                                            |
| 11. ORR measurement       | after exchanging electrolytes to one without Cl <sup>-</sup>                                                                                                                          |

**Table S5.** Pt ion concentration determination.

| Item                   | Detail                                                                                                                                                                     |
|------------------------|----------------------------------------------------------------------------------------------------------------------------------------------------------------------------|
| Apparatuses            | Metrohm VA663, Metrohm IME663                                                                                                                                              |
| Electrodes             | WE: hanging mercury drop, CE: Glassy carbon, RE: Ag/AgCl/3 M KCl                                                                                                           |
| Supporting Electrolyte | 0.6 M sulfuric acid, 0.18 mM hydrazine and 6.6 mM formaldehyde mixture deaerated by nitrogen bubbling 10 min                                                               |
| Operational modes      | Potential sweep mode Differential pulse mode (modulation time: 0.05 s, modulation amplitude: 0.05 V, Interval: 0.2 s, step potential: 0.004 V)                             |
| Procedures             | Nitrogen bubbling: 10 s<br>Mercury drop refresh: 5 drops<br>Pre-condensation: at -0.7 V, stirrer 1500 rpm, 60 s<br>Potential sweep 10 s after stirrer stop: -0.7 to -1.1 V |
| Signal Peak            | at -0.83 V Pt: 50, 100 and 150 ppt. See Figure S2.                                                                                                                         |
| Calibration            | Pt: 50, 100 and 150 ppt. See Figure S2.                                                                                                                                    |

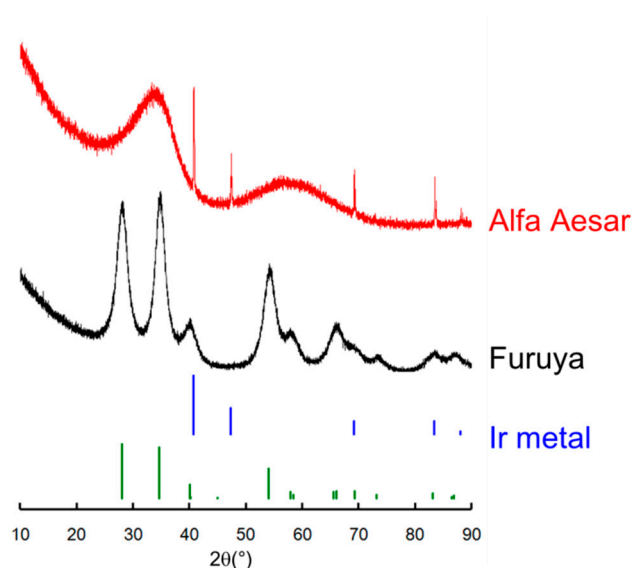**Figure S1.** XRD patterns of two commercial iridium oxides.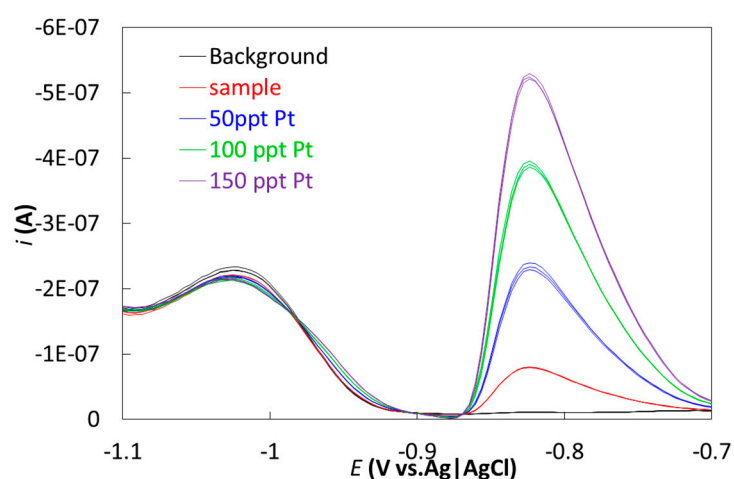**Figure S2.** Stripping voltammogram for Pt concentration determination.

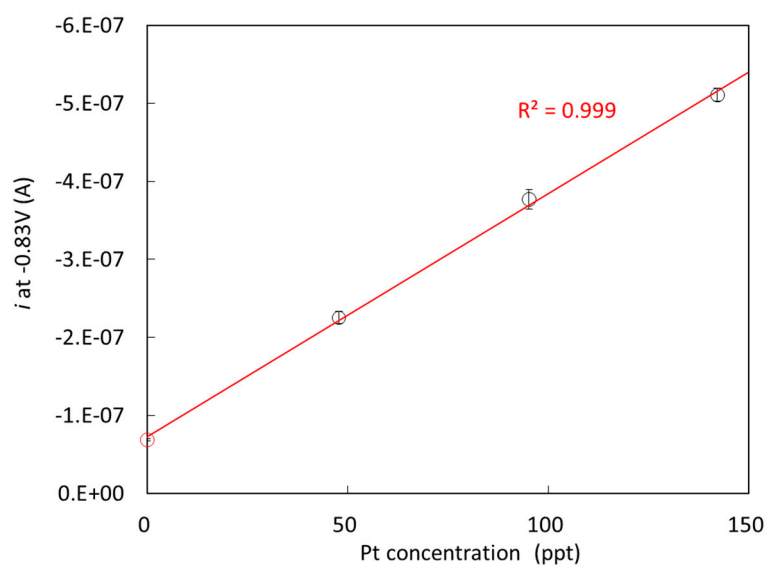

**Figure S3.** Calibration line for Pt concentration determination using the peak current at  $-0.83\text{ V}$ .

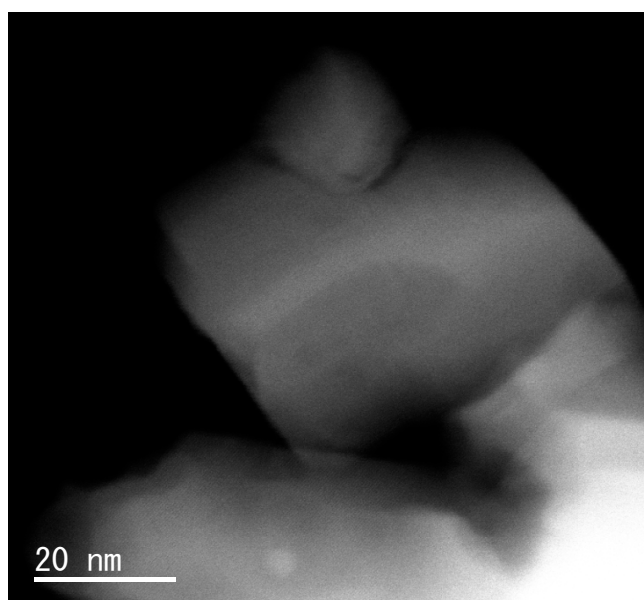

**Figure S4.** TEM image of Co-Pt bronze after ADT.
